# Supplementary material for: SARS-CoV-2 Antibody Profiles in Maternal Serum and Breast Milk Following mRNA COVID-19 Vaccination: A Longitudinal Prospective Observational Cohort Study
Source: MDPI journal article supplement (doi:10.3390/vaccines11111643), 2023-10-26
Supplement: s1 [file s1]

## Supplementary Data

Supplemenatry Table S1. Timing of sample collection relative to most recent vaccine dose.

| Time Point       | Range of Days* | Weeks Included* | Median Days* | Number of Samples Included |
|------------------|----------------|-----------------|--------------|----------------------------|
| Pre-Dose         | -14-0          | -2 to 0         | -2           | 8                          |
| 1-2 weeks Post 1 | 7-14           | 1 to 2          | 13.5         | 4                          |
| 3-4 weeks Post 1 | 18-28          | 3 to 4          | 21           | 9                          |
| Post 2           | 7-18           | 1 to 3          | 14           | 9                          |
| 1-month          | 26-41          | 4 to 7          | 28           | 10                         |
| 2-months         | 56-71          | 8 to 11         | 62           | 6                          |
| 3-months         | 79-107         | 12 to 16        | 95           | 9                          |
| 4-6 months       | 119-201        | 17 to 30        | 161          | 10                         |
| 7-9 months       | 215-259        | 31 to 37        | 259          | 5                          |

\*Timing is relative to most recent vaccine dose.
